# Supplementary material for: High-performance graphene oxide nanofiltration membrane with continuous nanochannels prepared by the in situ oxidation of MXene
Source: Royal Society of Chemistry journal article supplement (doi:10.1039/c9ta00137a), 2019-01-01
Supplement: c9ta00137a1.pdf [file c9ta00137a1.pdf]

Supporting Information

**High-performance Graphene Oxide Nanofiltration  
Membrane with Continuous Nanochannels Prepared by in  
Situ Oxidation of MXene**

*Ruiyi Han<sup>a</sup> and Peiyi Wu<sup>\*ab</sup>*

*<sup>a</sup>State Key Laboratory of Molecular Engineering of Polymers, Department of  
Macromolecular Science and Laboratory of Advanced Materials, Fudan University,  
Shanghai 200433, PR China*

*<sup>b</sup>State Key Laboratory for Modification of Chemical Fibers and Polymer Materials,  
College of Chemistry, Chemical Engineering and Biotechnology, Center for  
Advanced Low-Dimension Materials, Donghua University, Shanghai 201620, China*

*\*Authors for Correspondence: [peiyiwu@fudan.edu.cn](mailto:peiyiwu@fudan.edu.cn)*

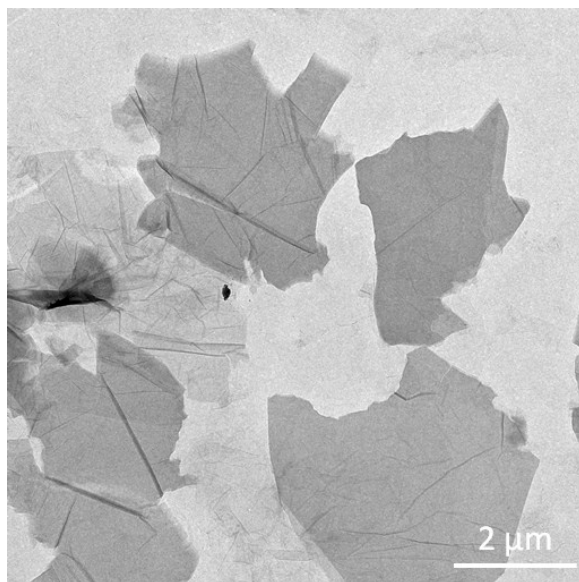

**Figure S1.** TEM image of GO

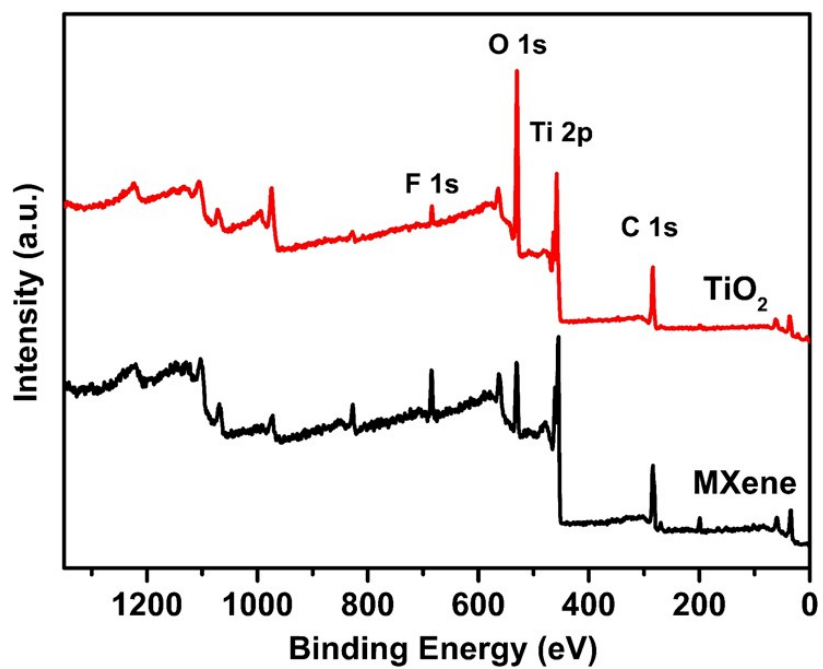

Figure S2. XPS spectra of MXene and  $\text{TiO}_2$  derived from oxidation of MXene.

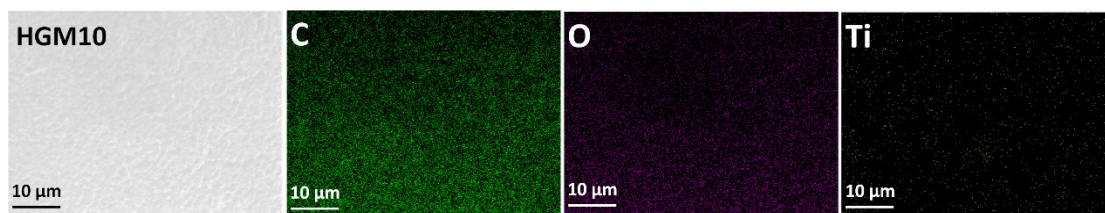

Figure S3. The EDS mapping of surface of HGM10.

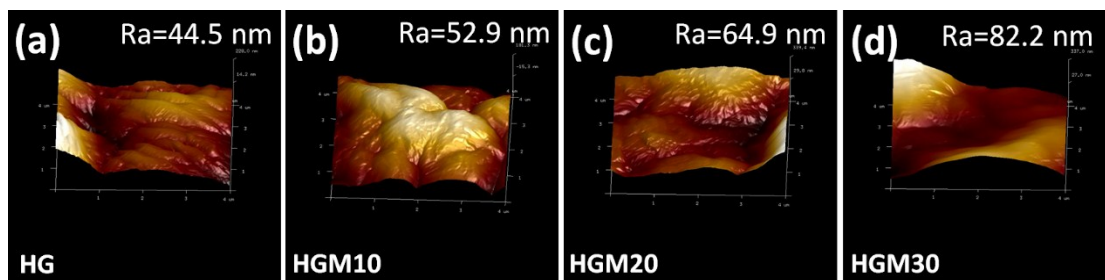

**Figure S4.** 3D height AFM images of (a) HG, (b) HGM10, (c) HGM20, (d) HGM30.

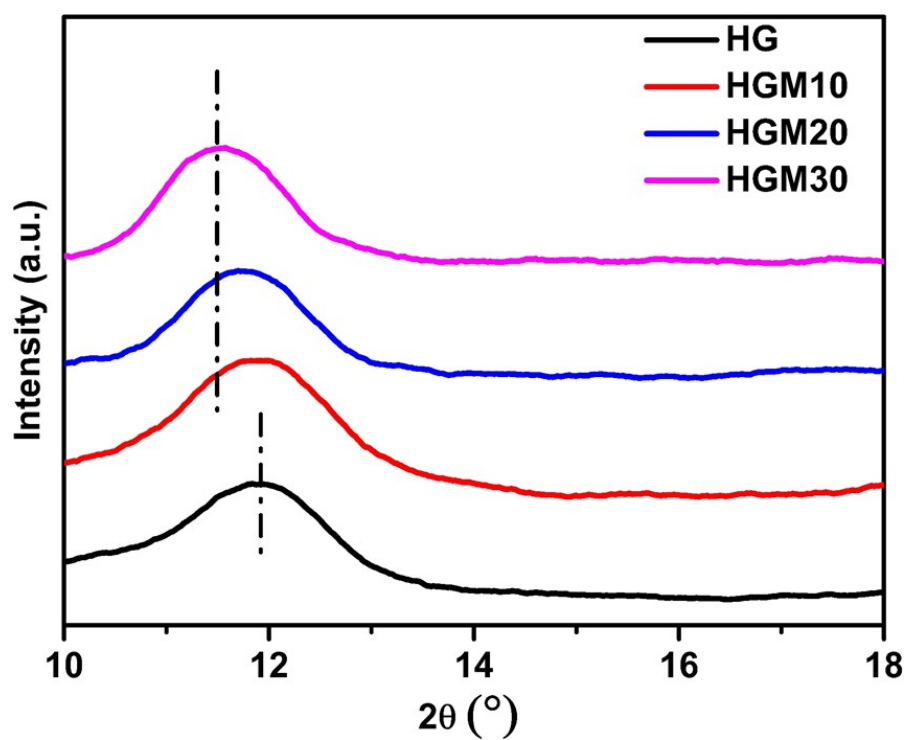

**Figure S5.** XRD patterns with partial enlarged detail of HG, HGM10, HGM20, HGM30.

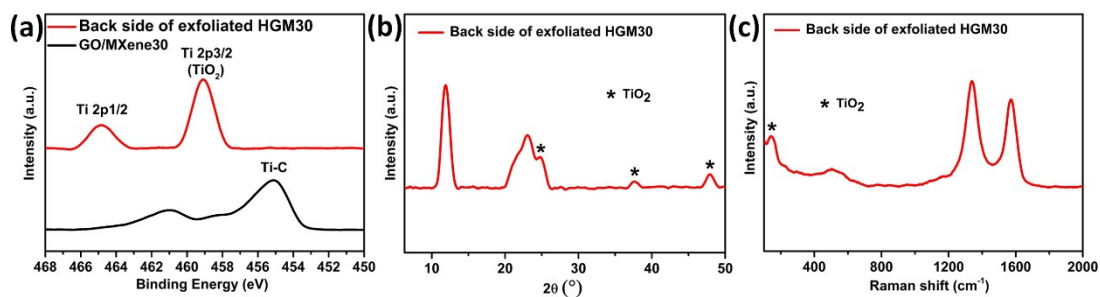

**Figure S6.** (a) Ti 2p XPS spectra of GO/MXene30 and back side of exfoliated HGM30, (b) XRD patterns, (c) Raman spectra of back side of exfoliated HGM30.

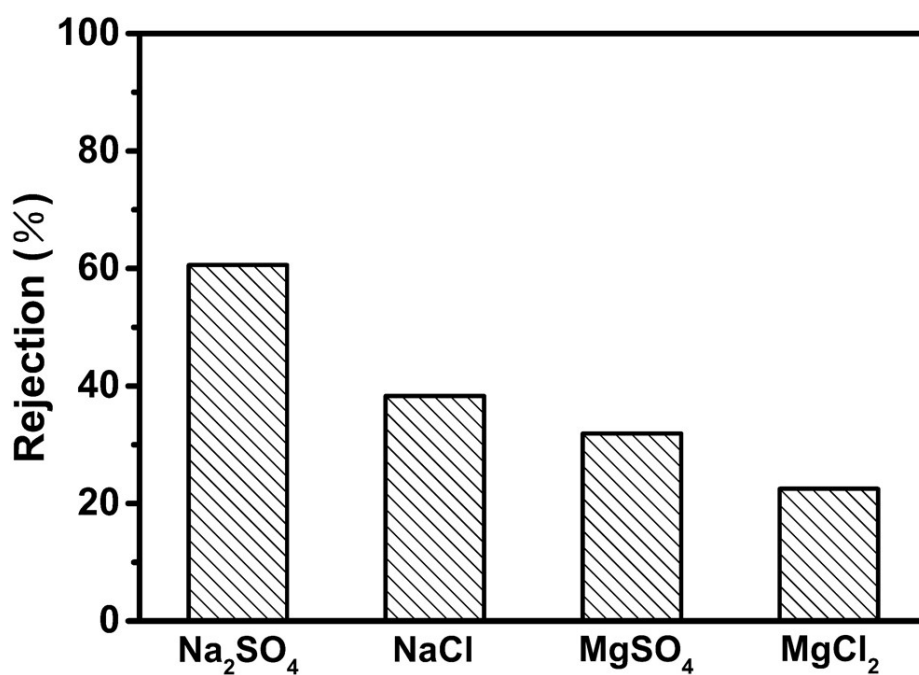

**Figure S7.** Rejection rate of HGM30 for four different salt ions.

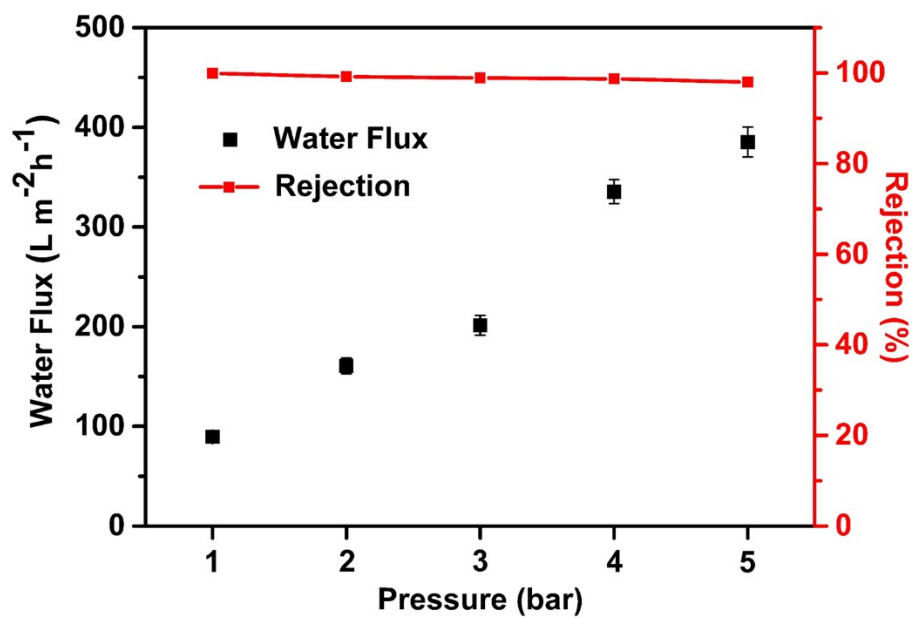

**Figure S8.** Pure water flux and rejection rate of HGM30 for RhB under different pressure.

**Table S1.** Separation performance of HGM30 and other representative works published recently.

| Membranes                     | Fabrication<br>method           | Water<br>Permeability<br>(L m <sup>-2</sup> h <sup>-1</sup> bar <sup>-1</sup> ) | Feed solution                     | Rejection<br>(%) | Ref.         |
|-------------------------------|---------------------------------|---------------------------------------------------------------------------------|-----------------------------------|------------------|--------------|
| rGO-MWCNT<br>/PC              | Pressure-assisted<br>filtration | 52.7                                                                            | MB (0.01 g L <sup>-1</sup> )      | 99.8             | 1            |
|                               |                                 |                                                                                 | AO7 (0.03 × 10 <sup>-3</sup> M)   | 99.4             |              |
|                               |                                 |                                                                                 | RhB (0.02 × 10 <sup>-3</sup> M)   | 100              |              |
| Base-refluxed<br>rGO/PVDF     | Vacuum filtration               | 21.8                                                                            | MB (0.02 × 10 <sup>-3</sup> M)    | 99.8             | 2            |
|                               |                                 |                                                                                 | DR 81 (0.02 × 10 <sup>-3</sup> M) | 99.9             |              |
|                               |                                 |                                                                                 | RhB (0.02 × 10 <sup>-3</sup> M)   | 78               |              |
| rGO-MWNT<br>/PVDF             | Vacuum filtration               | 11.3                                                                            | DY (0.02 × 10 <sup>-3</sup> M)    | 99               | 3            |
|                               |                                 |                                                                                 | MO (0.05 g L <sup>-1</sup> )      | 96               |              |
| CDs-GO/MCE                    | Vacuum filtration               | 408–434                                                                         | MB (10ppm)                        | 99.5             | 4            |
|                               |                                 |                                                                                 | MO (10ppm)                        | 99.2             |              |
|                               |                                 |                                                                                 | RhB (10ppm)                       | 99.7             |              |
| GO/Modified -<br>PAN          | GO ink Printing                 | 15-85                                                                           | MO (0.02 × 10 <sup>-3</sup> M)    | 95.9             | 5            |
|                               |                                 |                                                                                 | AB 45 (0.02×10 <sup>-3</sup> M)   | 99.9             |              |
| GO-TiO <sub>2</sub> /PC       | Vacuum filtration               | ~7                                                                              | MO (10 ppm)                       | 100              | 6            |
|                               |                                 |                                                                                 | RhB (10 ppm)                      | 100              |              |
| Nanostrand<br>channeled GO/PC | Vacuum filtration               | 695                                                                             | EB (15 × 10 <sup>-6</sup> M)      | 83.5             | 7            |
| GO/Nylon 66                   | Shear alignment                 | 71                                                                              | MR (10ppm)                        | 90               | 8            |
|                               |                                 |                                                                                 | MO,OG,MB (10ppm)                  | >90              |              |
| HGM30                         | Vacuum filtration               | 89.6                                                                            | RhB (10ppm)                       | 99.3             | This<br>work |
|                               |                                 |                                                                                 | MB (10ppm)                        | 97.6             |              |
|                               |                                 |                                                                                 | CV (10ppm)                        | 99.1             |              |
|                               |                                 |                                                                                 | NR (10ppm)                        | 98.6             |              |

## References

1. K. Goh, W. Jiang, H. E. Karahan, S. Zhai, L. Wei, D. Yu, A. G. Fane, R. Wang and Y. Chen, *Advanced Functional Materials*, 2016, **25**, 7348-7359.
2. Y. Han, Z. Xu and C. Gao, *Advanced Functional Materials*, 2013, **23**, 3693-3700.
3. Y. Han, Y. Jiang and C. Gao, *Acs Appl Mater Interfaces*, 2015, **7**, 8147.
4. W. Wang, E. Eftekhari, G. Zhu, X. Zhang, Z. Yan and Q. Li, *Chemical Communications*, 2014, **50**, 13089-13092.
5. M. Fathizadeh, H. N. Tien, K. Khivantsev, J. T. Chen and M. Yu, *Journal of Materials Chemistry A*, 2017, **5**.
6. C. Xu, A. Cui, Y. Xu and X. Fu, *Carbon*, 2013, **62**, 465-471.
7. H. Huang, Z. Song, N. Wei, L. Shi, Y. Mao, Y. Ying, L. Sun, Z. Xu and X. Peng, *Nature communications*, 2013, **4**, 2979.
8. A. Akbari, P. Sheath, S. T. Martin, D. B. Shinde, M. Shaibani, P. C. Banerjee, R. Tkacz, D. Bhattacharyya and M. Majumder, *Nature communications*, 2016, **7**, 10891.
